# Supplementary material for: Genome-wide survey and phylogeny of S-Ribosylhomocysteinase (LuxS) enzyme in bacterial genomes
Source: PubMed Central journal article supplement (PMC5029033; doi:10.1186/s12864-016-3002-x), 2016-09-20

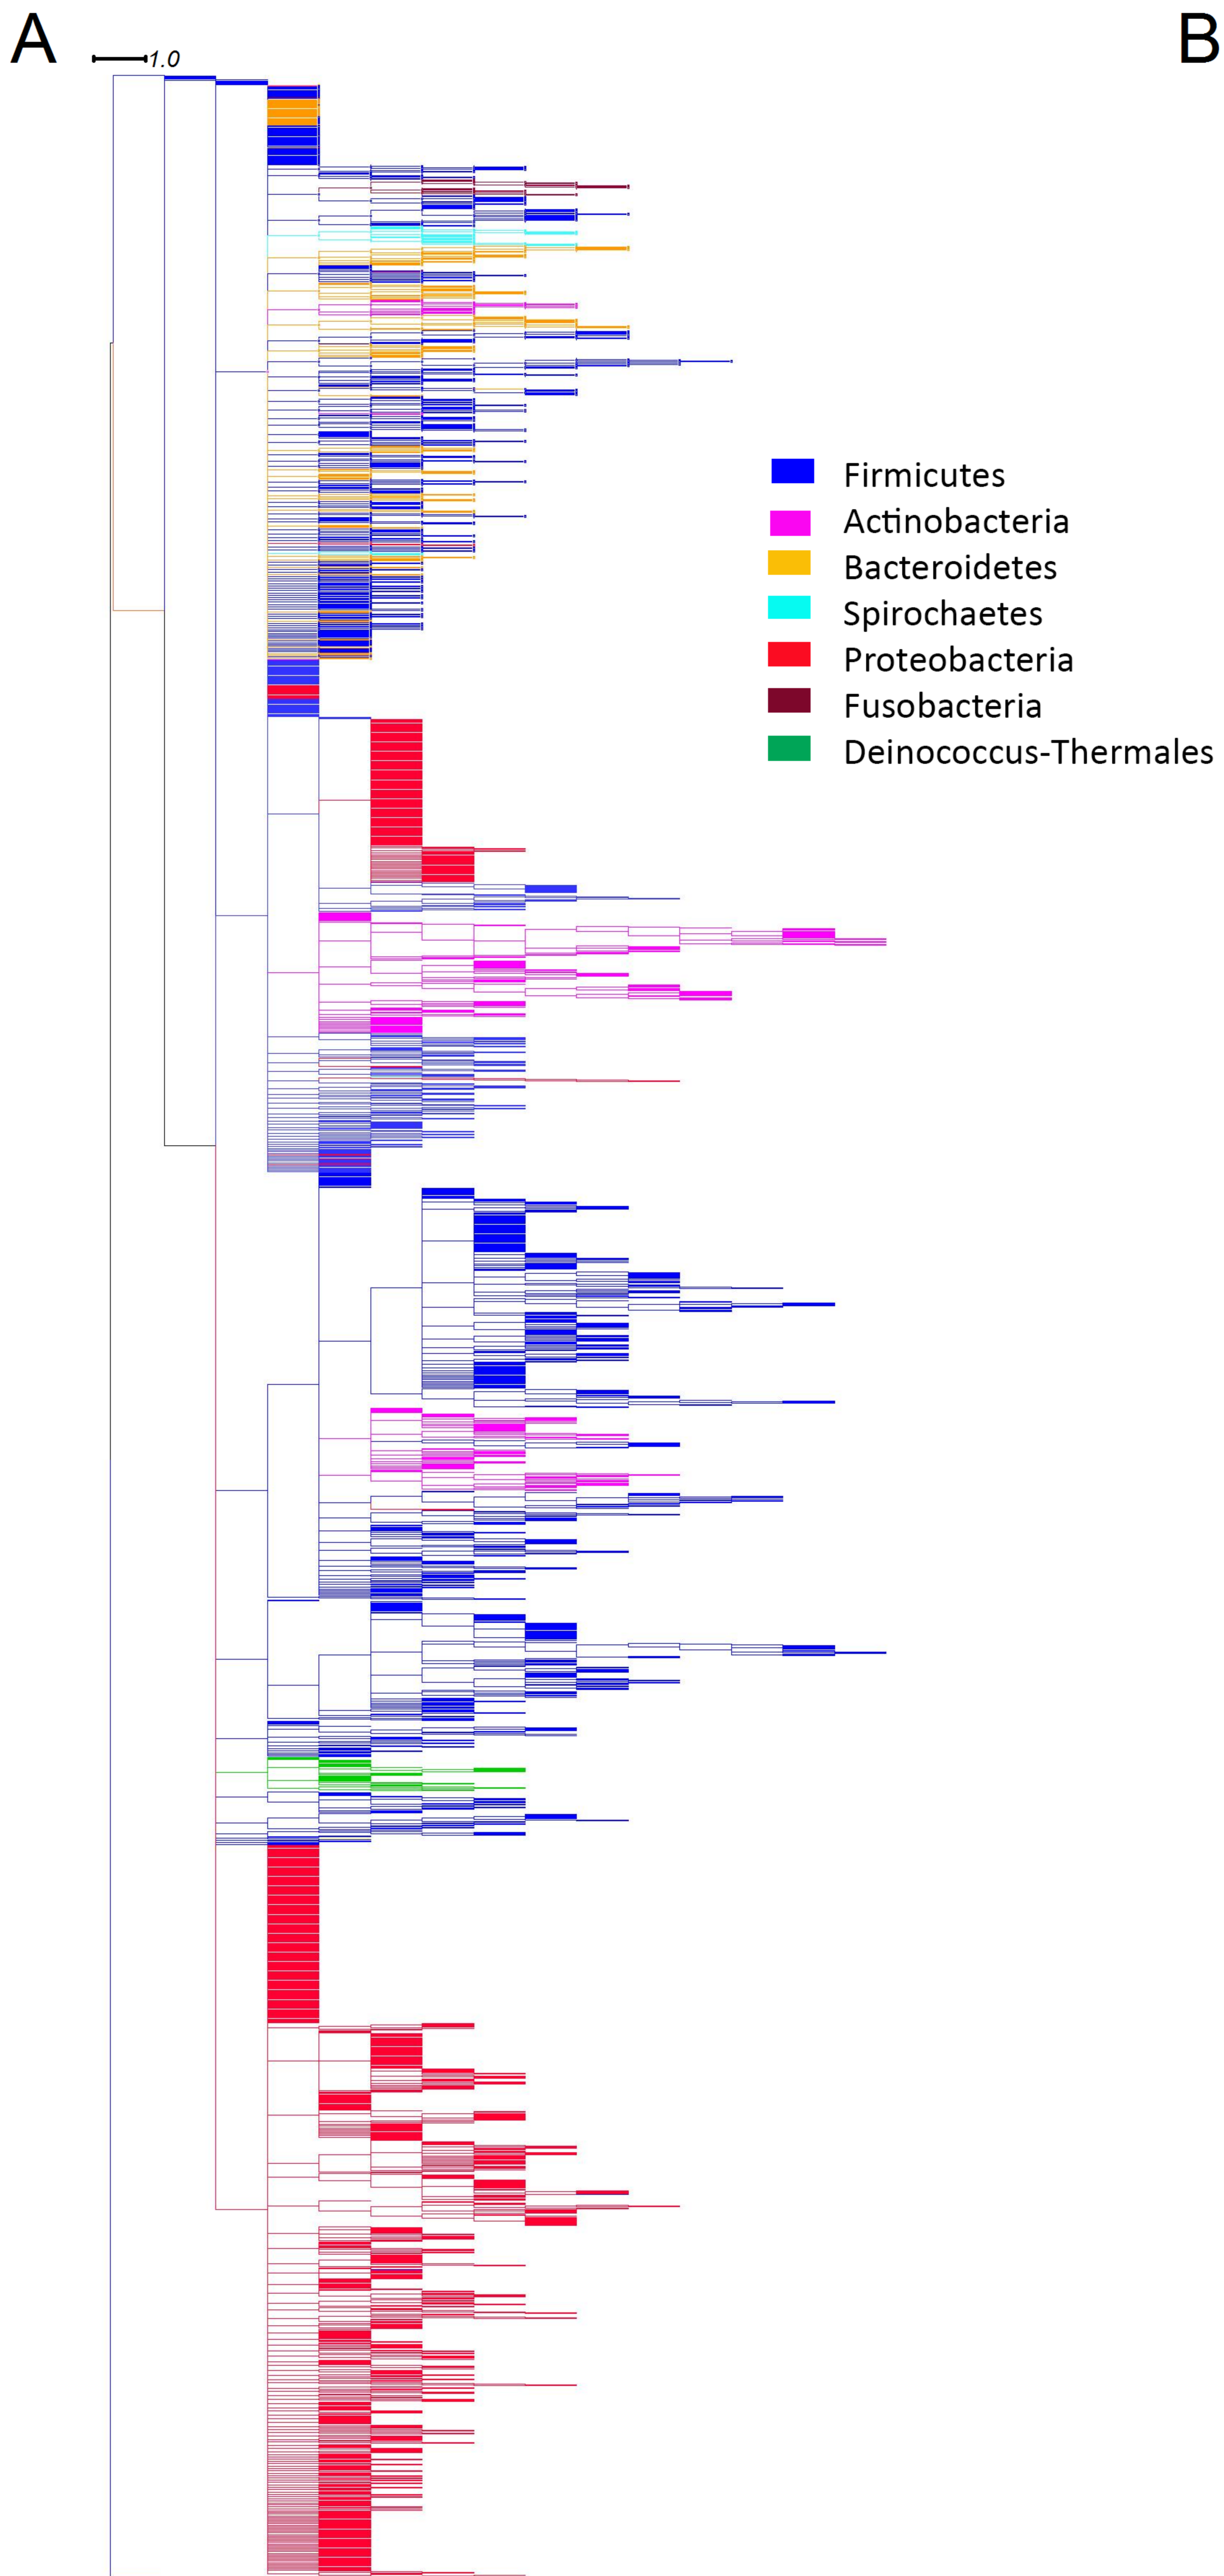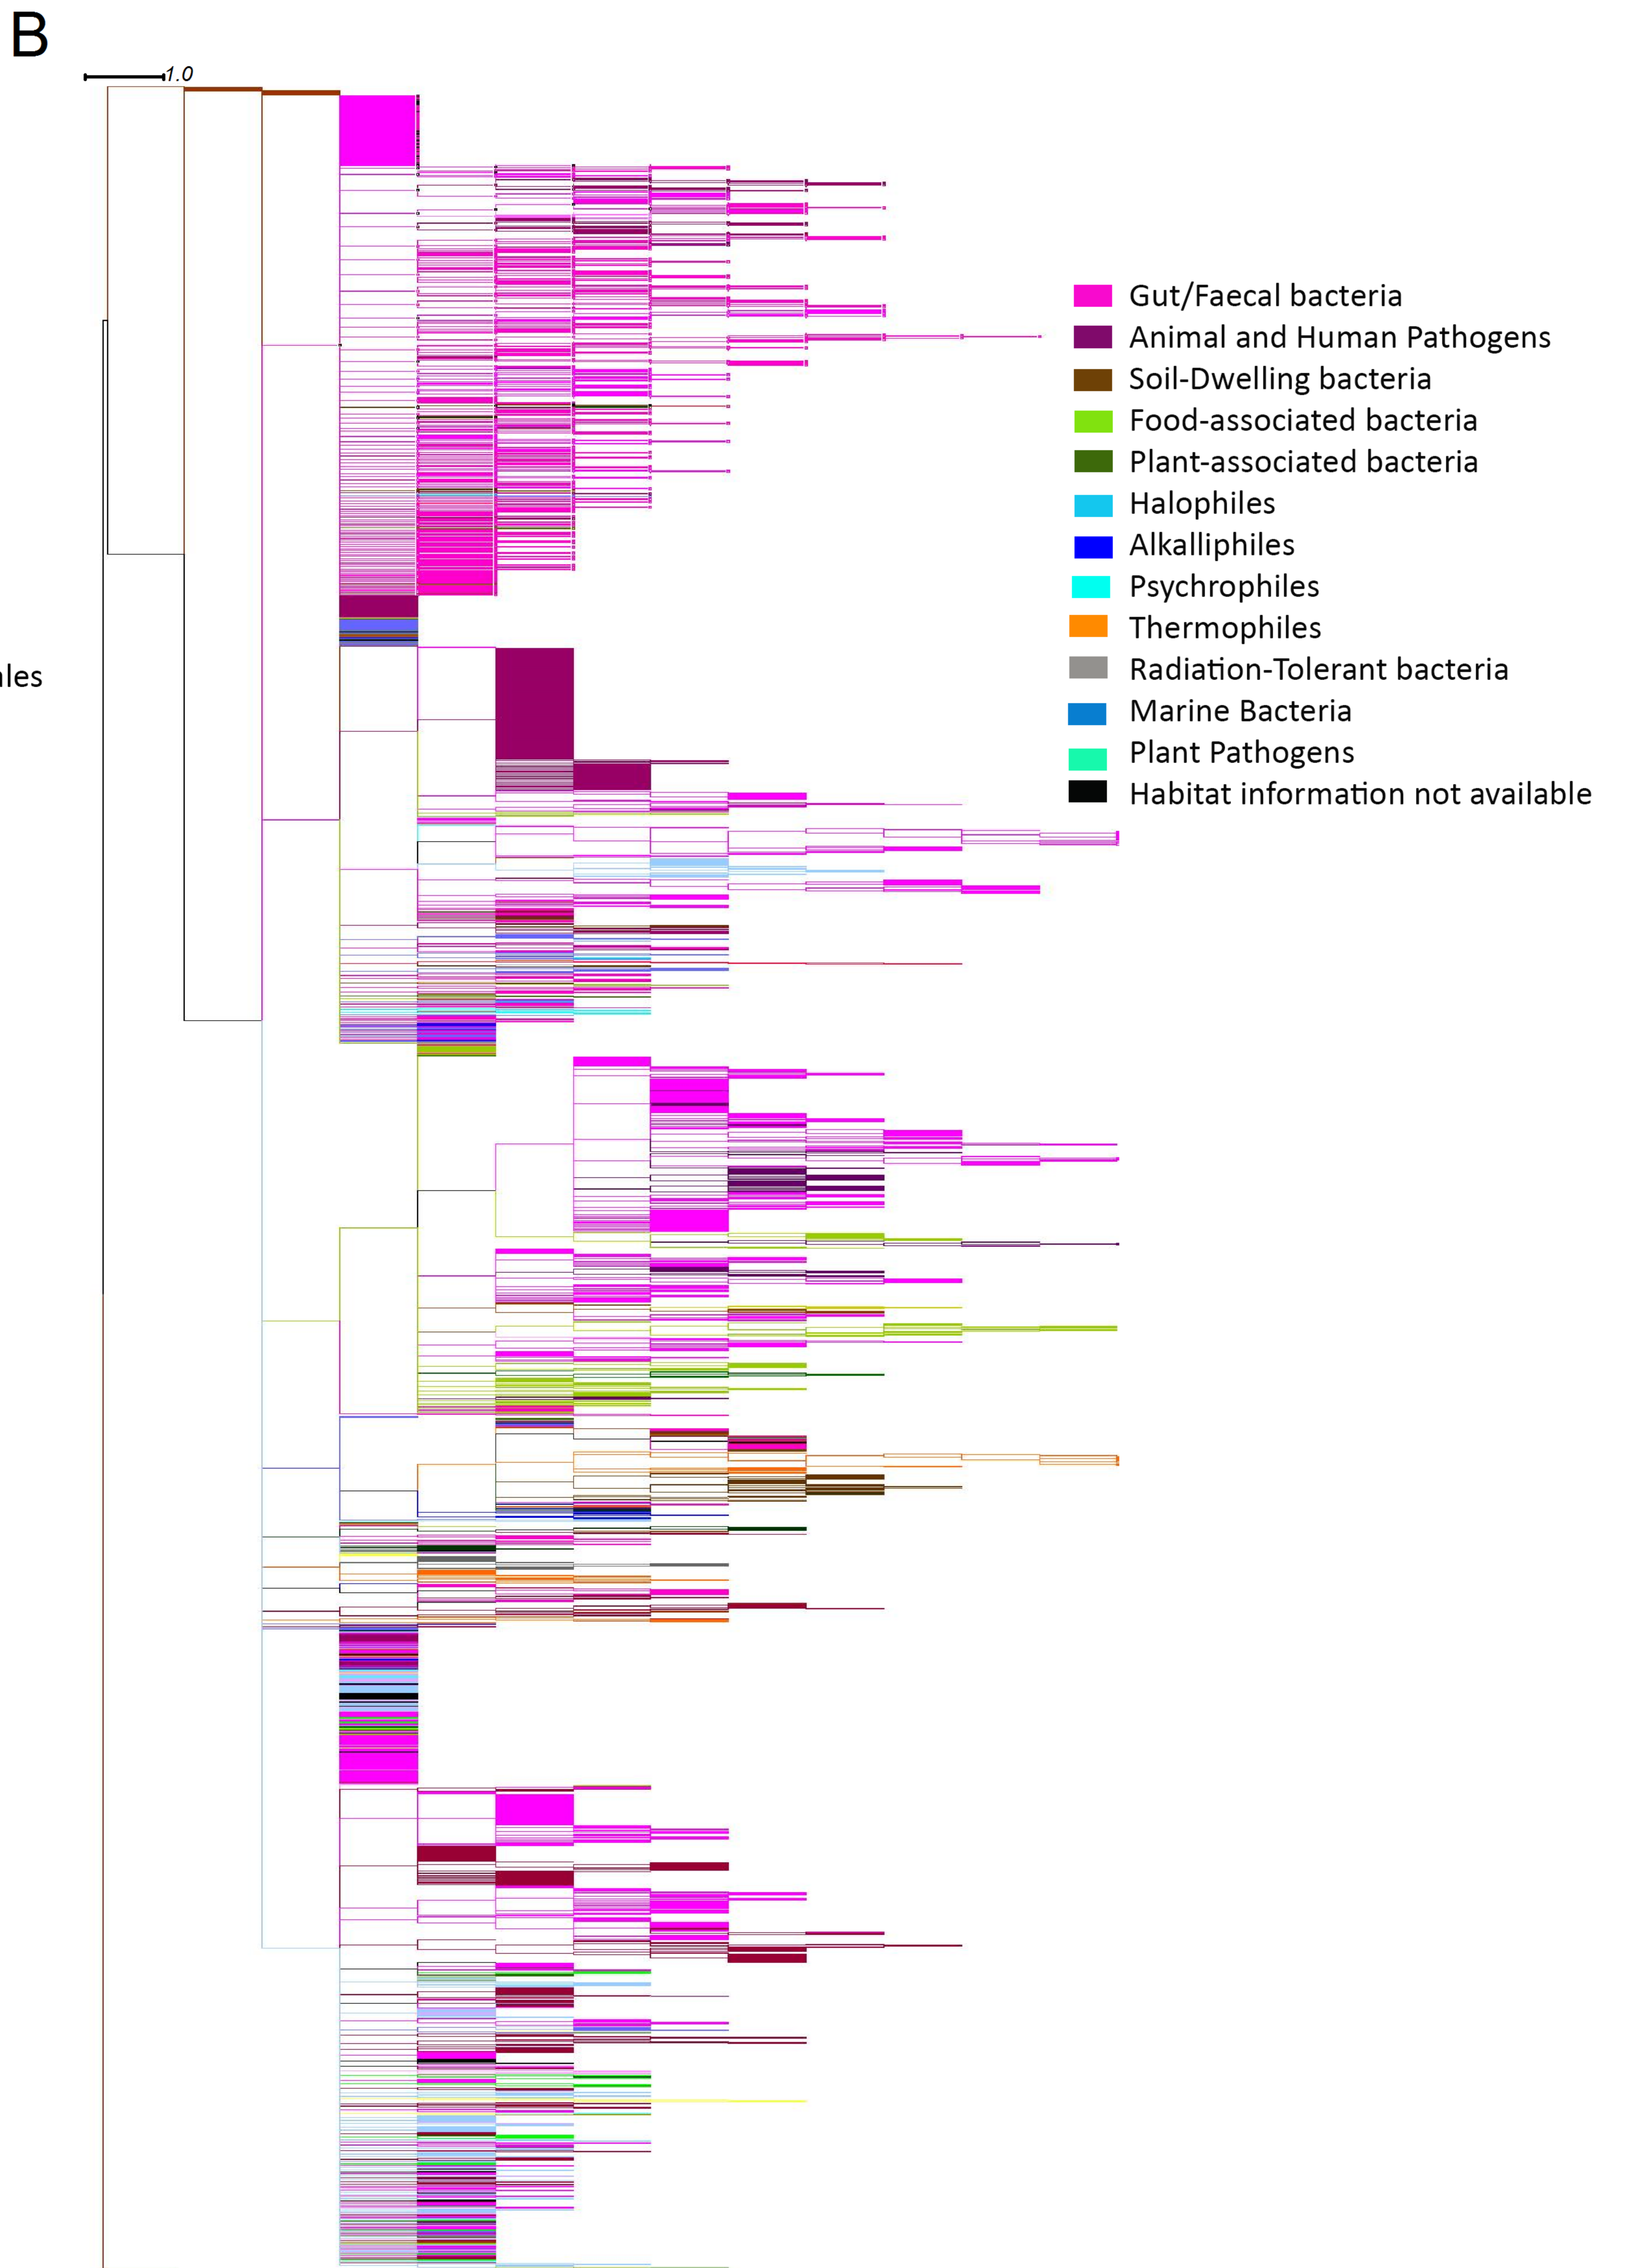

Supplement: 12864_2016_3002_MOESM6_ESM.pdf [file 12864_2016_3002_MOESM6_ESM.pdf]
