# Supplementary material for: Genome-wide survey and phylogeny of S-Ribosylhomocysteinase (LuxS) enzyme in bacterial genomes
Source: PubMed Central journal article supplement (PMC5029033; doi:10.1186/s12864-016-3002-x), 2016-09-20
Supplement: 12864_2016_3002_MOESM11_ESM.pdf [file 12864_2016_3002_MOESM11_ESM.pdf]

# Number of CA atoms vs. RMSD

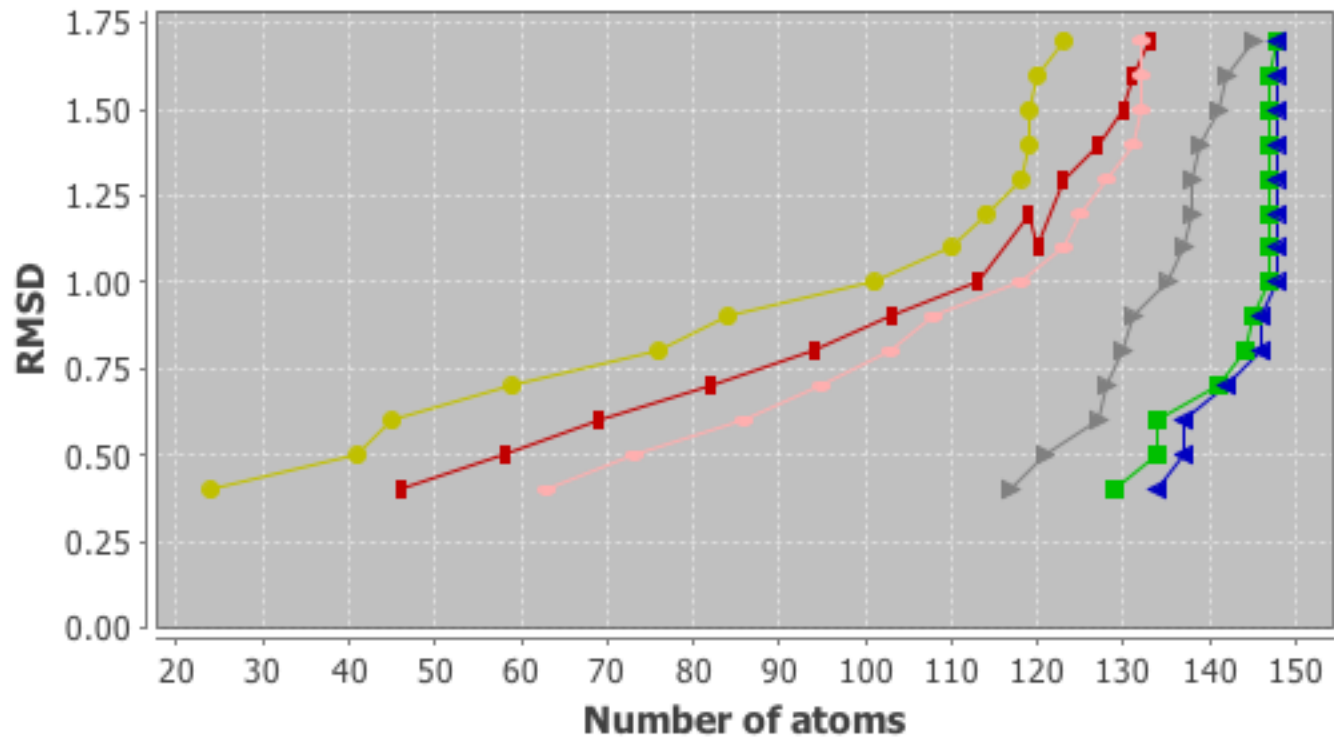

1j98.pdb    Borrelia\_burgdorferi.pdb    Amphibacillus\_jilinesis.pdb  
Lactobacillus\_plantarum.pdb    Truepera\_radiovictrix.pdb    Vibrio\_harveyi.pdb
