# Supplementary material for: Genome-wide survey and phylogeny of S-Ribosylhomocysteinase (LuxS) enzyme in bacterial genomes
Source: PubMed Central journal article supplement (PMC5029033; doi:10.1186/s12864-016-3002-x), 2016-09-20

1j98.pdb/1-153

*Borrelia burgdorferi*.pdb/1-157

*Amphibacillus jilinensis*.pdb/1-155

*Lactobacillus plantarum*.pdb/1-158

*Truepera radiovictrix*.pdb/1-176

*Vibrio harveyi*.pdb/1-172

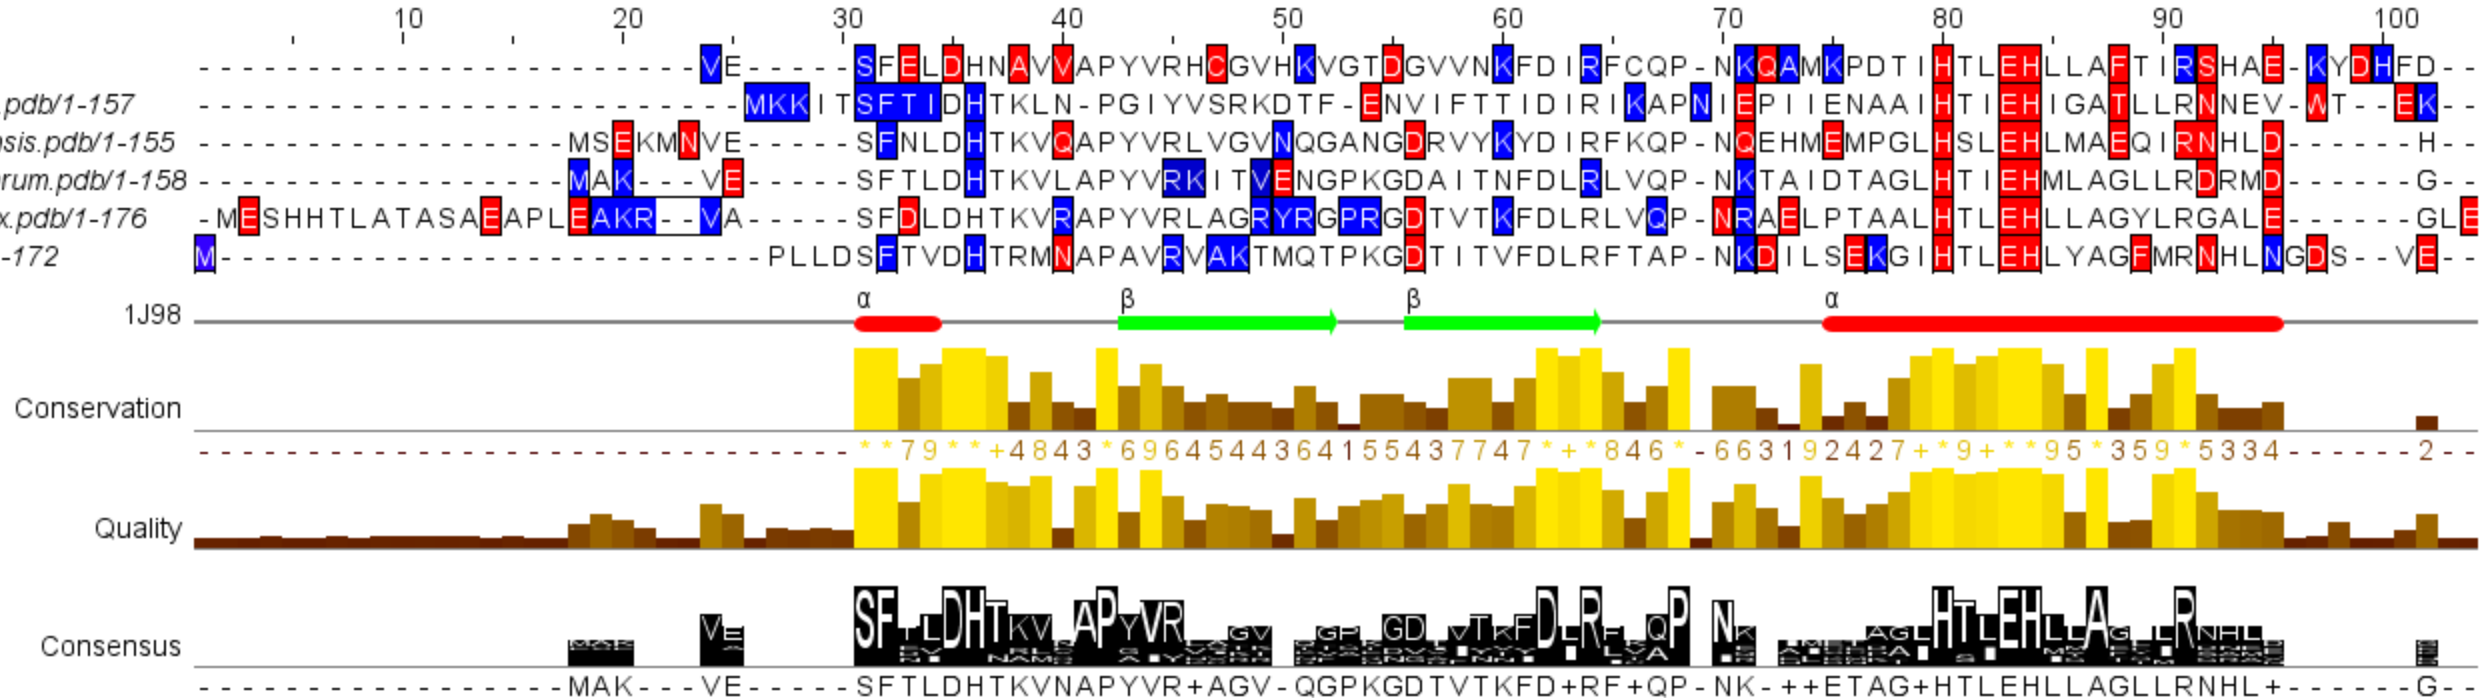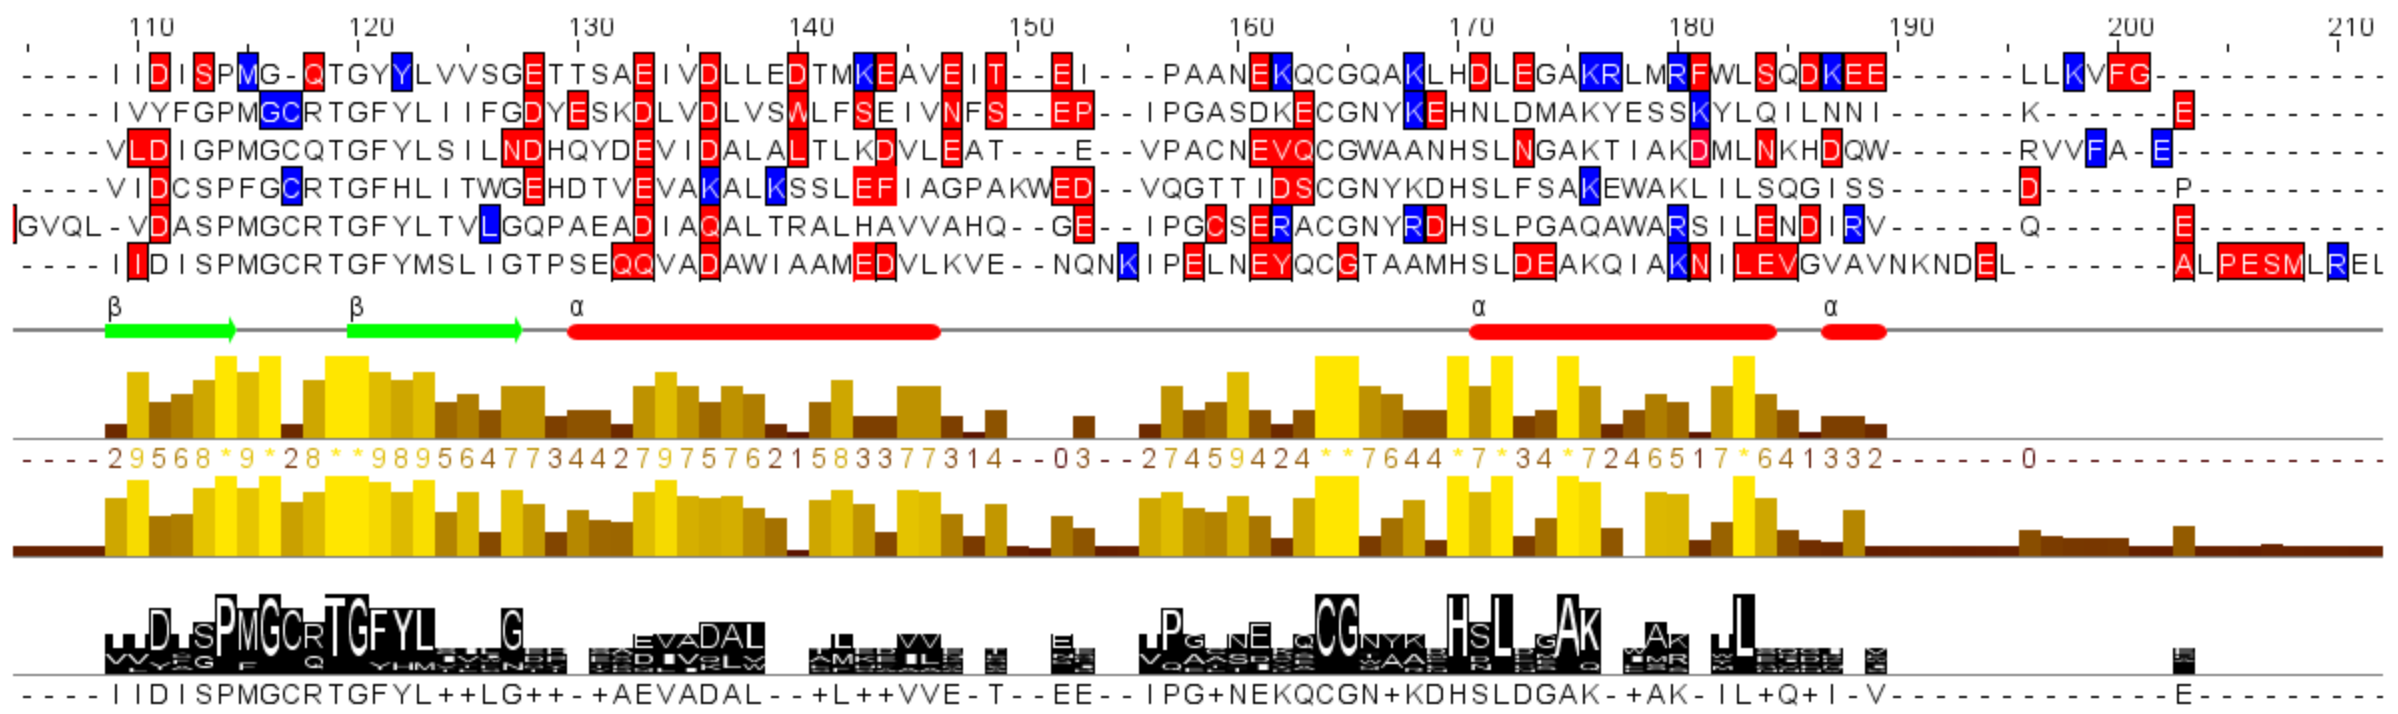

Supplement: 12864_2016_3002_MOESM12_ESM.pdf [file 12864_2016_3002_MOESM12_ESM.pdf]
